# Supplementary material for: Screening of Parkinsonian subtle fine-motor impairment from touchscreen typing via deep learning
Source: PubMed Central journal article supplement (PMC7387517; doi:10.1038/s41598-020-69369-1), 2020-07-28
Supplement: 41598_2020_69369_MOESM1_ESM.pdf [file 41598_2020_69369_MOESM1_ESM.pdf]

# Screening of Parkinsonian subtle fine-motor impairment from touchscreen typing via deep learning

Dimitrios Iakovakis<sup>1</sup>, K. Ray Chaudhuri<sup>2</sup>, Lisa Klingelhoefer<sup>3</sup>, Sevasti Bostantzopoulou<sup>4</sup>, Zoe Katsarou<sup>5</sup>, Dhaval Trivedi<sup>2</sup>, Heinz Reichmann<sup>3</sup>, Stelios Hadjidimitriou<sup>1</sup>, Vasileios Charisis<sup>1</sup>, and Leontios J. Hadjileontiadis<sup>6,1</sup>

<sup>1</sup> Department of Electrical and Computer Engineering, Aristotle University of Thessaloniki, Thessaloniki, Greece.

<sup>2</sup> King's College London, Institute of Psychiatry, Psychology & Neuroscience and Parkinson Foundation Centre of Excellence, King's College Hospital, London, United Kingdom.

<sup>3</sup> Department of Neurology, Technical University Dresden, Dresden, Germany

<sup>4</sup> Third Neurological Clinic, G. Papanikolaou Hospital, Thessaloniki, Greece.

<sup>5</sup> Department of Neurology, Hippokration Hospital, Thessaloniki, Greece.

<sup>6</sup> Department of Electrical and Computer Engineering, Khalifa University of Science and Technology, Abu Dhabi, UAE.

**Fine-motor impairment (FMI) is progressively expressed in early Parkinson's Disease (PD) patients and is now known to be evident in the immediate prodromal stage of the condition. The clinical techniques for detecting FMI may not be robust enough and here, we show that the subtle FMI of early PD patients can be effectively estimated from the analysis of natural smartphone touchscreen typing via deep learning networks, trained in stages of initialization and fine-tuning. In a validation dataset of 36,000 typing sessions from 39 subjects (17 healthy/22 PD patients with medically validated UPDRS Part III single-item scores), the proposed approach achieved values of area under the receiver operating characteristic curve (AUC) of 0.89 (95% confidence interval: 0.80-0.96) with sensitivity/specificity:0.90/0.83. The derived estimations result in statistically significant ( $p < 0.05$ ) correlation of 0.66/0.73/0.58 with the clinical standard UPDRS Part III items 22/23/31, respectively. Further validation analysis on 9 de novo PD patients vs. 17 healthy controls classification resulted in AUC of 0.97 (0.93-1.00) with 0.93/0.90. For 253 remote study participants, with self-reported health status providing 252,000 typing sessions via a touchscreen typing data acquisition mobile app (iPrognosis), the proposed approach predicted 0.79 AUC (0.66-0.91) with 0.76/0.71. Remote and unobtrusive screening of subtle FMI via natural smartphone usage, may assist in consolidating early and accurate diagnosis of PD.**

|                                                             | De-Novo PD patients                      | Healthy                                  |             |
|-------------------------------------------------------------|------------------------------------------|------------------------------------------|-------------|
| n (total n = 26)                                            | 9                                        | 17                                       |             |
| Demographic characteristics                                 |                                          |                                          | p-value     |
| Women # (%)                                                 | 3                                        | 7                                        | $p = 0.97$  |
| Men # (%)                                                   | 6                                        | 10                                       | $p = 0.97$  |
| Avg. Age, years (std)                                       | 56 (8)                                   | 55 (9)                                   | $p = 0.3$   |
| Subject #/# who completed education level H/U               | 2/7                                      | 4/13                                     | $p = 0.7$   |
| Subject #/#/#/#/# with smartphone experience level E1/E2/E3 | 1/1/7                                    | 0/0/13                                   | $p = 0.13$  |
| Avg. sum of UPDRS Part III (std)                            | 12 (5)                                   | 1.3 (2.1)                                | $p < 0.05$  |
| dBSi mean (std)/<br>dAFSi mean (std)/<br>dRSi mean (std)    | 0.52(0.41)/<br>1.01(0.30)/<br>0.92(0.43) | 0.17(0.04)/<br>0.30(0.19)/<br>0.31(0.12) | $p < 0.001$ |

Table S1: Demographics table of TS<sub>2</sub>

|                                                             | PD patients | Healthy  |
|-------------------------------------------------------------|-------------|----------|
| n (total n = 253)                                           | 67          | 186      |
| Demographic characteristics                                 |             |          |
| Women # (%)                                                 | 24          | 67       |
| Men # (%)                                                   | 43          | 117      |
| Avg. Age, years (std)                                       | 61 (7)      | 58 (7.5) |
| Subject #/# who completed education level H/U               | 25/42       | 53/133   |
| Subject #/#/#/#/# with smartphone experience level E1/E2/E3 | 4/4/59      | 6/3/177  |
| Data contribution                                           |             |          |
| Avg. valid recordings (std)                                 | 231         | 405      |

Table S2: Demographics table of TS<sub>3</sub>

| Logit Regression Results |                |                   |              |              |              |              |
|--------------------------|----------------|-------------------|--------------|--------------|--------------|--------------|
| =====                    |                |                   |              |              |              |              |
| Dep. Variable:           | Label          | No. Observations: |              |              |              | 39           |
| Model:                   | Logit          | Df Residuals:     |              |              |              | 34           |
| Method:                  | MLE            | Df Model:         |              |              |              | 4            |
| Pseudo R-squ.:           | inf            | Log-Likelihood:   |              |              |              | -5484.7      |
| converged:               | False          | LL-Null:          |              |              |              | 0.0000       |
| Covariance Type:         | nonrobust      | LLR p-value:      |              |              |              | 1.000        |
| =====                    |                |                   |              |              |              |              |
|                          | coef           | std err           | z            | P> z         | [0.025       | 0.975]       |
| -----                    |                |                   |              |              |              |              |
| const                    | 46.2474        | 7.59e+05          | 6.09e-05     | 1.000        | -1.49e+06    | 1.49e+06     |
| Age                      | 0.0223         | 0.053             | 0.419        | 0.675        | -0.082       | 0.126        |
| Use                      | -25.1029       | 3.8e+05           | -6.61e-05    | 1.000        | -7.44e+05    | 7.44e+05     |
| Gender                   | 0.1514         | 1.071             | 0.141        | 0.888        | -1.947       | 2.250        |
| <b>dRSi</b>              | <b>4.1826</b>  | <b>1.455</b>      | <b>2.874</b> | <b>0.004</b> | <b>1.330</b> | <b>7</b>     |
| =====                    |                |                   |              |              |              |              |
| Logit Regression Results |                |                   |              |              |              |              |
| =====                    |                |                   |              |              |              |              |
| Dep. Variable:           | Label          | No. Observations: |              |              |              | 39           |
| Model:                   | Logit          | Df Residuals:     |              |              |              | 34           |
| Method:                  | MLE            | Df Model:         |              |              |              | 4            |
| Pseudo R-squ.:           | inf            | Log-Likelihood:   |              |              |              | -5366.1      |
| converged:               | False          | LL-Null:          |              |              |              | 0.0000       |
| Covariance Type:         | nonrobust      | LLR p-value:      |              |              |              | 1.000        |
| =====                    |                |                   |              |              |              |              |
|                          | coef           | std err           | z            | P> z         | [0.025       | 0.975]       |
| -----                    |                |                   |              |              |              |              |
| const                    | 43.4143        | 4.19e+05          | 0.000        | 1.000        | -8.22e+05    | 8.22e+05     |
| Age                      | 0.0376         | 0.053             | 0.713        | 0.476        | -0.066       | 0.141        |
| Use                      | -24.0509       | 2.1e+05           | -0.000       | 1.000        | -4.11e+05    | 4.11e+05     |
| Gender                   | -0.0422        | 1.058             | -0.040       | 0.968        | -2.115       | 2.031        |
| <b>dAFSi</b>             | <b>4.5383</b>  | <b>1.623</b>      | <b>2.796</b> | <b>0.005</b> | <b>1.357</b> | <b>7</b>     |
| =====                    |                |                   |              |              |              |              |
| Logit Regression Results |                |                   |              |              |              |              |
| =====                    |                |                   |              |              |              |              |
| Dep. Variable:           | Label          | No. Observations: |              |              |              | 39           |
| Model:                   | Logit          | Df Residuals:     |              |              |              | 34           |
| Method:                  | MLE            | Df Model:         |              |              |              | 4            |
| Pseudo R-squ.:           | inf            | Log-Likelihood:   |              |              |              | -4033.0      |
| converged:               | False          | LL-Null:          |              |              |              | 0.0000       |
| Covariance Type:         | nonrobust      | LLR p-value:      |              |              |              | 1.000        |
| =====                    |                |                   |              |              |              |              |
|                          | coef           | std err           | z            | P> z         | [0.025       | 0.975]       |
| -----                    |                |                   |              |              |              |              |
| const                    | 47.8974        | 9.15e+05          | 5.24e-05     | 1.000        | -1.79e+06    | 1.79e+06     |
| Age                      | 0.0235         | 0.053             | 0.447        | 0.655        | -0.080       | 0.127        |
| Use                      | -26.4710       | 4.57e+05          | -5.79e-05    | 1.000        | -8.97e+05    | 8.97e+05     |
| Gender                   | 0.4695         | 0.982             | 0.478        | 0.633        | -1.455       | 2.394        |
| <b>dBSi</b>              | <b>14.6698</b> | <b>7.121</b>      | <b>2.060</b> | <b>0.039</b> | <b>0.714</b> | <b>28.62</b> |

Figure S1 Logistic regression tests using the subject status (PD or control) as dependent variable with the TS1 and Smartphone Usage (Use), age (Age) gender (Gender) and the prediction (dAF/R/B-Si) as independent variables.

| Logit Regression Results |                  |                   |              |              |               |               |
|--------------------------|------------------|-------------------|--------------|--------------|---------------|---------------|
| =====                    |                  |                   |              |              |               |               |
| Dep. Variable:           | Label            | No. Observations: | 26           |              |               |               |
| Model:                   | Logit            | Df Residuals:     | 21           |              |               |               |
| Method:                  | MLE              | Df Model:         | 4            |              |               |               |
| Date:                    | Thu, 28 Nov 2019 | Pseudo R-squ.:    | inf          |              |               |               |
| Time:                    | 16:07:26         | Log-Likelihood:   | -inf         |              |               |               |
| converged:               | False            | LL-Null:          | 0.0000       |              |               |               |
| Covariance Type:         | nonrobust        | LLR p-value:      | 1.000        |              |               |               |
| =====                    |                  |                   |              |              |               |               |
|                          | coef             | std err           | z            | P> z         | [0.025        | 0.975]        |
| -----                    |                  |                   |              |              |               |               |
| const                    | 49.7841          | 2.78e+05          | 0.000        | 1.000        | -5.46e+05     | 5.46e+05      |
| Age                      | -0.0788          | 0.105             | -0.749       | 0.454        | -0.285        | 0.127         |
| Use                      | -26.1749         | 1.39e+05          | -0.000       | 1.000        | -2.73e+05     | 2.73e+05      |
| Gender                   | -2.4017          | 4.352             | -0.552       | 0.581        | -10.931       | 6.127         |
| <b>dRSi</b>              | <b>15.8839</b>   | <b>6.859</b>      | <b>2.316</b> | <b>0.021</b> | <b>2.441</b>  | <b>29.3</b>   |
| =====                    |                  |                   |              |              |               |               |
| Logit Regression Results |                  |                   |              |              |               |               |
| =====                    |                  |                   |              |              |               |               |
| Dep. Variable:           | Label            | No. Observations: | 26           |              |               |               |
| Model:                   | Logit            | Df Residuals:     | 21           |              |               |               |
| Method:                  | MLE              | Df Model:         | 4            |              |               |               |
| Date:                    | Thu, 28 Nov 2019 | Pseudo R-squ.:    | inf          |              |               |               |
| Time:                    | 16:09:15         | Log-Likelihood:   | -inf         |              |               |               |
| converged:               | False            | LL-Null:          | 0.0000       |              |               |               |
| Covariance Type:         | nonrobust        | LLR p-value:      | 1.000        |              |               |               |
| =====                    |                  |                   |              |              |               |               |
|                          | coef             | std err           | z            | P> z         | [0.025        | 0.975]        |
| -----                    |                  |                   |              |              |               |               |
| const                    | 34.2961          | 1.05e+05          | 0.000        | 1.000        | -2.07e+05     | 2.07e+05      |
| Age                      | -0.0669          | 0.113             | -0.594       | 0.553        | -0.288        | 0.154         |
| Use                      | -19.0832         | 5.27e+04          | -0.000       | 1.000        | -1.03e+05     | 1.03e+05      |
| Gender                   | -0.0886          | 1.504             | -0.059       | 0.953        | -3.036        | 2.859         |
| <b>dBSi</b>              | <b>45.7413</b>   | <b>25.624</b>     | <b>1.785</b> | <b>0.074</b> | <b>-4.481</b> | <b>95.964</b> |
| =====                    |                  |                   |              |              |               |               |
| Logit Regression Results |                  |                   |              |              |               |               |
| =====                    |                  |                   |              |              |               |               |
| Dep. Variable:           | Label            | No. Observations: | 26           |              |               |               |
| Model:                   | Logit            | Df Residuals:     | 21           |              |               |               |
| Method:                  | MLE              | Df Model:         | 4            |              |               |               |
| Date:                    | Thu, 28 Nov 2019 | Pseudo R-squ.:    | inf          |              |               |               |
| Time:                    | 16:10:14         | Log-Likelihood:   | -inf         |              |               |               |
| converged:               | False            | LL-Null:          | 0.0000       |              |               |               |
| Covariance Type:         | nonrobust        | LLR p-value:      | 1.000        |              |               |               |
| =====                    |                  |                   |              |              |               |               |
|                          | coef             | std err           | z            | P> z         | [0.025        | 0.975]        |
| -----                    |                  |                   |              |              |               |               |
| const                    | 57.9487          | 1.74e+06          | 3.34e-05     | 1.000        | -3.4e+06      | 3.4e+06       |
| Age                      | -0.0791          | 0.137             | -0.579       | 0.563        | -0.347        | 0.189         |
| Use                      | -30.8468         | 8.68e+05          | -3.55e-05    | 1.000        | -1.7e+06      | 1.7e+06       |
| Gender                   | -2.8425          | 8.297             | -0.343       | 0.732        | -19.105       | 13.420        |
| <b>dAFSi</b>             | <b>13.2140</b>   | <b>6.467</b>      | <b>2.043</b> | <b>0.041</b> | <b>0.538</b>  | <b>25.8</b>   |

Figure S2 Logistic regression tests using the subject status (PD or control) as dependent variable with the TS2 and Smartphone Usage (Use), age (Age) gender (Gender) and the prediction (dAF/R/B-Si) as independent variables.

| Logit Regression Results |               |              |                   |              |              |             |
|--------------------------|---------------|--------------|-------------------|--------------|--------------|-------------|
| =====                    |               |              |                   |              |              |             |
| Dep. Variable:           |               | Label        | No. Observations: |              |              | 253         |
| Model:                   |               | Logit        | Df Residuals:     |              |              | 248         |
| Method:                  |               | MLE          | Df Model:         |              |              | 4           |
| Pseudo R-squ.:           |               | inf          | Log-Likelihood:   |              |              | -inf        |
| converged:               |               | True         | LL-Null:          |              |              | 0.0000      |
| Covariance Type:         |               | nonrobust    | LLR p-value:      |              |              | 1.000       |
| =====                    |               |              |                   |              |              |             |
|                          | coef          | std err      | z                 | P> z         | [0.025       | 0.975]      |
| -----                    |               |              |                   |              |              |             |
| const                    | -1.7256       | 1.317        | -1.310            | 0.190        | -4.307       | 0.856       |
| Age                      | -0.0154       | 0.019        | -0.795            | 0.426        | -0.053       | 0.023       |
| Use                      | -0.2342       | 0.354        | -0.662            | 0.508        | -0.927       | 0.459       |
| Gender                   | 0.1256        | 0.351        | 0.358             | 0.721        | -0.563       | 0.814       |
| <b>dRSi</b>              | <b>2.5578</b> | <b>0.400</b> | <b>6.390</b>      | <b>0.000</b> | <b>1.773</b> | <b>3.34</b> |

  

| Logit Regression Results |               |              |                   |              |              |             |
|--------------------------|---------------|--------------|-------------------|--------------|--------------|-------------|
| =====                    |               |              |                   |              |              |             |
| Dep. Variable:           |               | Label        | No. Observations: |              |              | 253         |
| Model:                   |               | Logit        | Df Residuals:     |              |              | 248         |
| Method:                  |               | MLE          | Df Model:         |              |              | 4           |
| Pseudo R-squ.:           |               | inf          | Log-Likelihood:   |              |              | -64909.     |
| converged:               |               | True         | LL-Null:          |              |              | 0.0000      |
| Covariance Type:         |               | nonrobust    | LLR p-value:      |              |              | 1.000       |
| =====                    |               |              |                   |              |              |             |
|                          | coef          | std err      | z                 | P> z         | [0.025       | 0.975]      |
| -----                    |               |              |                   |              |              |             |
| const                    | -1.2623       | 1.220        | -1.035            | 0.301        | -3.654       | 1.129       |
| Age                      | -0.0004       | 0.018        | -0.022            | 0.982        | -0.035       | 0.035       |
| Use                      | -0.2640       | 0.323        | -0.818            | 0.413        | -0.896       | 0.368       |
| Gender                   | -0.0642       | 0.328        | -0.195            | 0.845        | -0.708       | 0.579       |
| <b>dBSi</b>              | <b>2.3348</b> | <b>0.471</b> | <b>4.956</b>      | <b>0.000</b> | <b>1.411</b> | <b>3.25</b> |

  

| Logit Regression Results |               |              |                   |              |              |             |
|--------------------------|---------------|--------------|-------------------|--------------|--------------|-------------|
| =====                    |               |              |                   |              |              |             |
| Dep. Variable:           |               | Label        | No. Observations: |              |              | 253         |
| Model:                   |               | Logit        | Df Residuals:     |              |              | 248         |
| Method:                  |               | MLE          | Df Model:         |              |              | 4           |
| Pseudo R-squ.:           |               | inf          | Log-Likelihood:   |              |              | -inf        |
| converged:               |               | True         | LL-Null:          |              |              | 0.0000      |
| Covariance Type:         |               | nonrobust    | LLR p-value:      |              |              | 1.000       |
| =====                    |               |              |                   |              |              |             |
|                          | coef          | std err      | z                 | P> z         | [0.025       | 0.975]      |
| -----                    |               |              |                   |              |              |             |
| const                    | -1.8121       | 1.312        | -1.381            | 0.167        | -4.384       | 0.760       |
| Age                      | -0.0130       | 0.019        | -0.687            | 0.492        | -0.050       | 0.024       |
| Use                      | -0.2722       | 0.357        | -0.762            | 0.446        | -0.973       | 0.428       |
| Gender                   | 0.0099        | 0.346        | 0.029             | 0.977        | -0.668       | 0.688       |
| <b>dAFSi</b>             | <b>2.9731</b> | <b>0.468</b> | <b>6.356</b>      | <b>0.000</b> | <b>2.056</b> | <b>3.89</b> |

Figure S3 Logistic regression tests using the subject status (PD or control) as dependent variable with the TS3 and Smartphone Usage (Use), age (Age) gender (Gender) and the prediction (dAF/R/B-Si) as independent variables.
